# Supplementary material
Source: PubMed Central journal article supplement (PMC4567640)
Supplement: IAI.00769-15_zii999091425so1.pdf [file IAI.00769-15_zii999091425so1.pdf]

A.

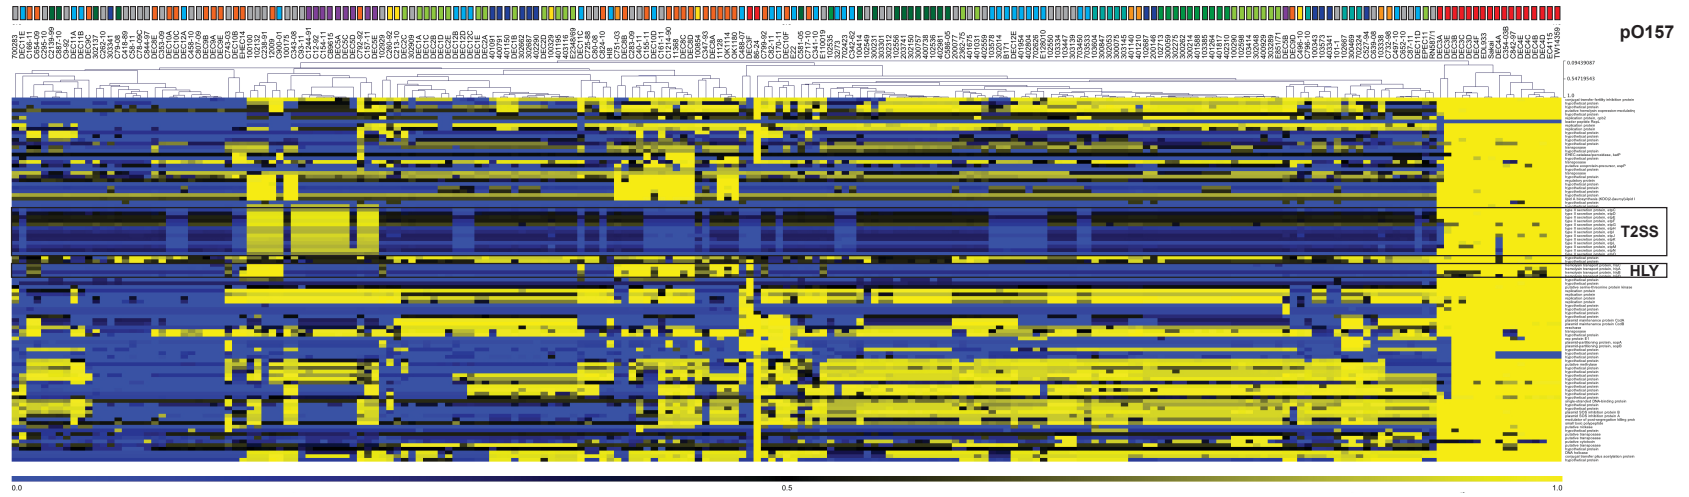

B.

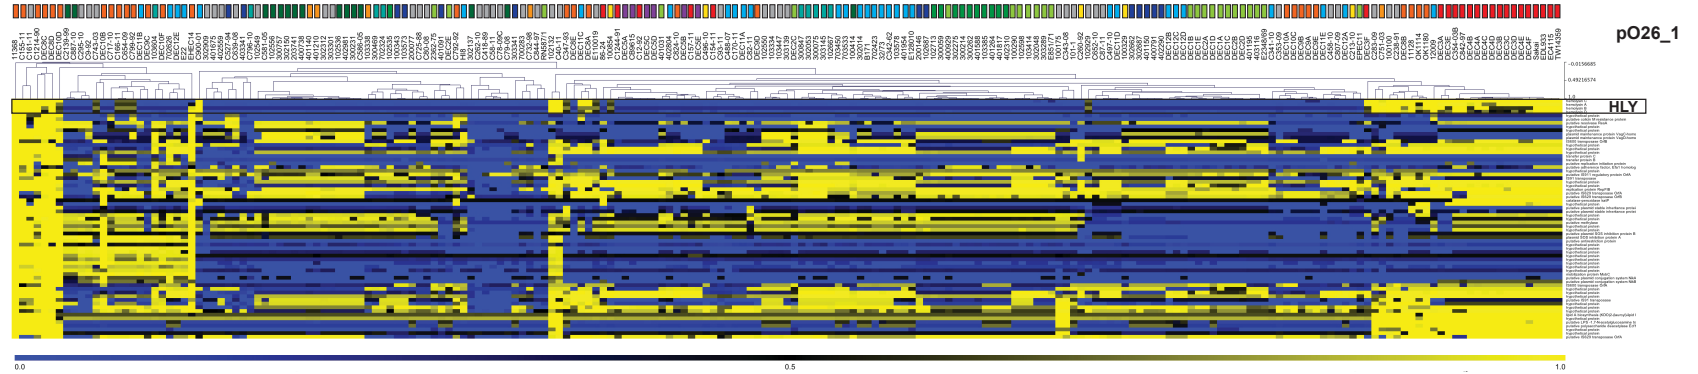

C.

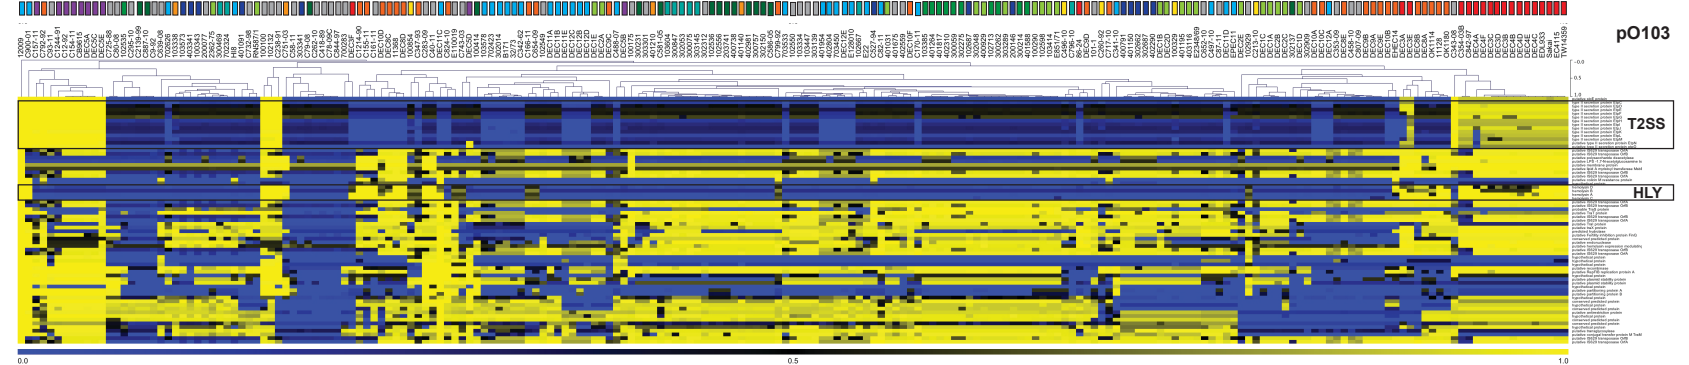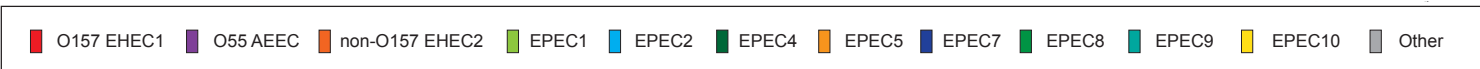

Figure S1.

**Figure S1. *In silico* identification of EHEC virulence plasmids, encoding the hemolysin, *hlyA*, in the AEEC genomes analyzed in this study.** BLAST Score Ratio (BSR) analysis was performed as previously described (1). The predicted amino acid sequences of the plasmid-encoded genes compared to each AEEC genome analyzed in this study using TBLASTN (2). Each box represents the BSR value of a single gene in one genome. Each row contains BSR values for a single a gene, while each column contains values identified in a single genome. Hierarchical cluster analysis was performed using the Pearson correlation coefficient of MeV (3-5). The colors of the heatmap indicate the BSR values corresponding to the presence (yellow), divergence (black), or absence (blue) of each of the plasmid genes in each AEEC genome. The colored rectangle above each genome indicates the phylogenomic lineage the genome belongs to in Figure 1. A box indicates the presence of the known and putative virulence-associated genes: hemolysin (HLY) and type II secretion system (T2SS). **A)** *In silico* identification of protein-encoding genes of the O157 EHEC virulence plasmid, pO157, of the O157:H7 EHEC prototype isolate EDL933, in the AEEC isolate genomes. **B)** *In silico* identification of proteins encoded by plasmid pO26\_1 from the LEE+/*stx*+ non-O157 EHEC isolate 11368 (6), in the AEEC isolate genomes. **C)** *In silico* identification of proteins encoded by plasmid pO103 from the LEE+/*stx*+ isolate 12009 (7), in the AEEC isolate genomes. In all three of the comparisons, the virulence-associated genes encoded by each plasmid (HLY and T2SS) were most conserved among isolates within the same pathovar. Meanwhile other conserved plasmid genes encoding putative proteins involved in plasmid replication and maintenance, were identified with similarity in both EPEC and EHEC.

**pMAR2 (97.9-kb), EPEC1 (FIB- Group I)**

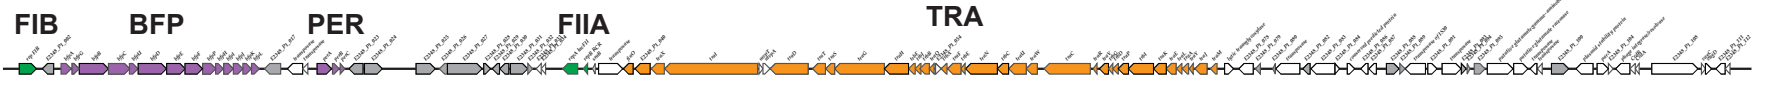

**p403116\_EAF (95.8-kb), EPEC1 (FIB- Group I)**

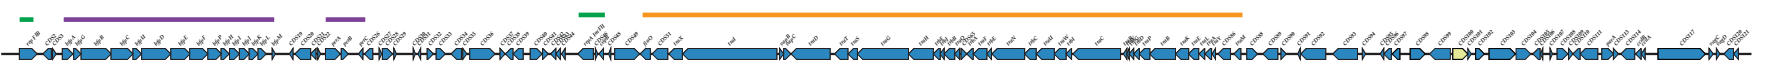

**p303289\_EAF (95.3-kb), EPEC1 (FIB- Group II)**

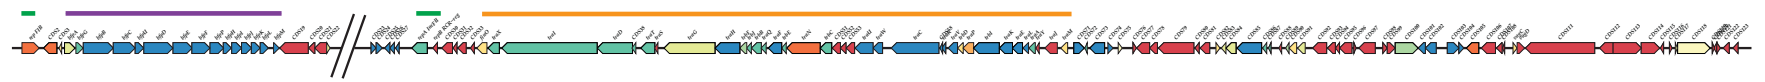

**p401091\_EAF (101.6-kb), EPEC7 (FIB- Group I)**

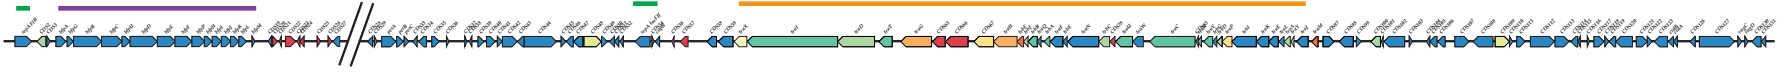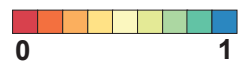

**Figure S2**

**Figure S2. Sequence diversity of the EAF plasmid identified in select EPEC isolates from the EPEC1 and EPEC7 phylogenomic lineages compared to the prototype EAF plasmid, pMAR2, from the EPEC1 isolate E2348/69 (8, 9).**

The genes identified in each of the EAF plasmids are denoted by arrows, and the direction of the arrows indicate the coding strand. The previously identified protein-encoding genes of pMAR2 are indicated by function as follows: replication (green), bundle-forming pilus (purple), conjugative transfer (orange), and unknown or other functions (white). The pseudogenes are indicated in grey. The colors of each gene of the EAF plasmids from EPEC isolates 403116, 303289, and 401091 indicate a BSR value determined by comparing the nucleotide sequence of the gene to the pMAR2 plasmid sequence using BLASTN. The BSR values indicate a particular gene has significant nucleotide similarity to sequence of pMAR2 (blue) or does not have similarity to pMAR2 (red). The vertical lines indicate the presence of a gap in the plasmid sequence. A green bar indicates the region containing genes encoding proteins involved replication, purple indicates the bundle-forming pilus genes, and orange indicates genes encoding predicted proteins involved in conjugative transfer. The phylogenetic group that the FIB *repA* sequence of each plasmid belongs to is indicated as Group I or Group II. Comparison of the EAF plasmid from two EPEC1 isolates and one EPEC7 isolate characterized in this study to the prototype EPEC1 plasmid pMAR2 demonstrated there can be greater diversity of the EAF plasmid among EPEC isolates within the same phylogenomic lineage compared to the EAF plasmid from EPEC of other phylogenomic lineages (EPEC7).



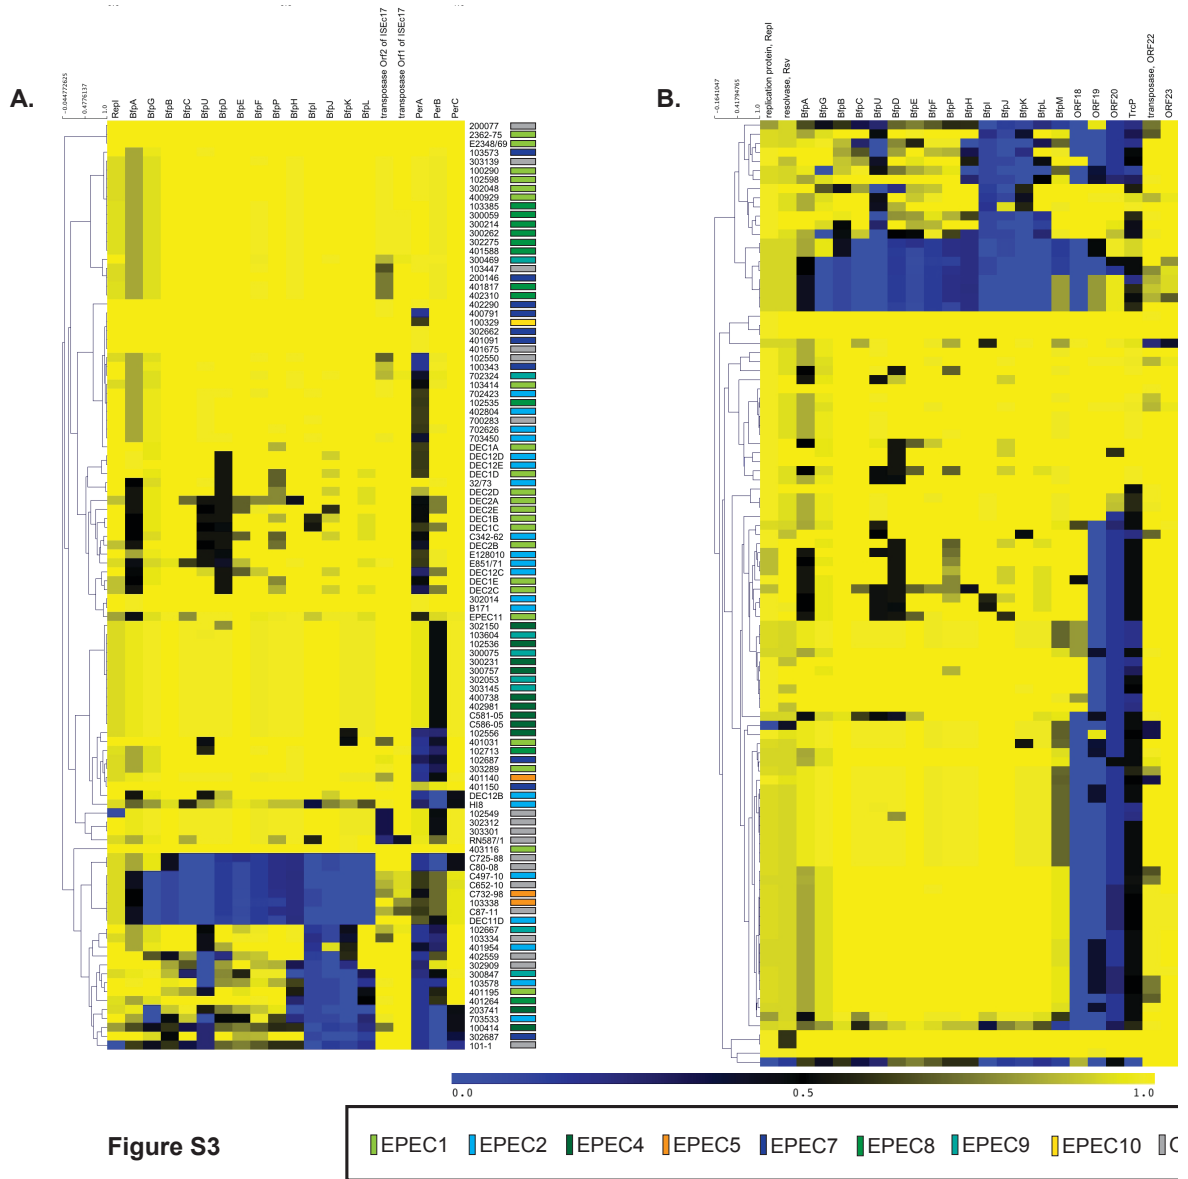

Figure S3

**Figure S3. Hierarchical cluster analysis of TBLASTN BSR values demonstrating the similarity of protein-encoding genes of the BFP operons of A) pMAR2, and B) pB171 identified in EPEC genomes analyzed in this study.** BLAST Score Ratio (BSR) analysis was performed as previously described (1) using the predicted amino acid sequences encoded by genes of the BFP operons of pMAR2 (A) and pB171 (B) compared to each AEEC genome analyzed in this study using TBLASTN (2). Each box represents the BSR value of a single gene in one genome. Each row contains BSR values for a single gene, while each column contains BSR values identified in a single genome. Hierarchical cluster analysis was performed using the Pearson correlation coefficient of MeV (3-5). The colors of the heatmap indicate the BSR values corresponding to the presence (yellow), divergence (black), or absence (blue) of each of the plasmid genes in each AEEC genome. The colored rectangle next to each EPEC isolate indicates the phylogenomic lineage the genome belongs to in Figure 1. Comparison of the genes in the BFP operon of plasmids pMAR2 and pB171 demonstrated that the BFP genes were highly conserved with the greatest sequence divergence observed in *bfpA* and the *per* genes. The additional genes within the BFP region of pB171 were identified primarily in other EPEC2 isolates, but were also present in a few isolates from other phylogenomic lineages.

**A. *bfpA***

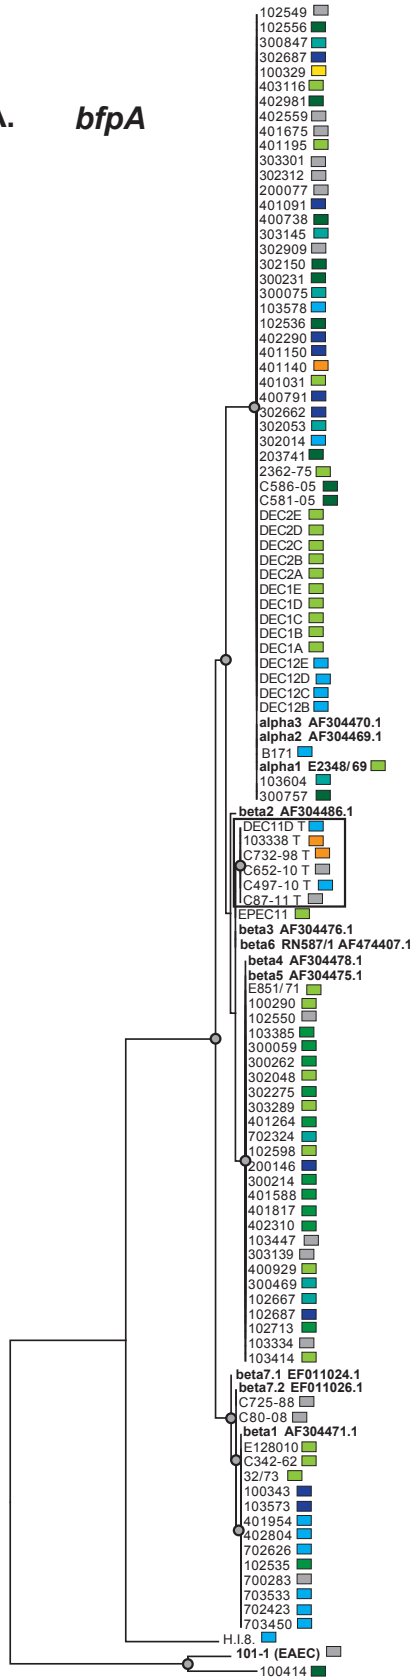

**B. *perA***

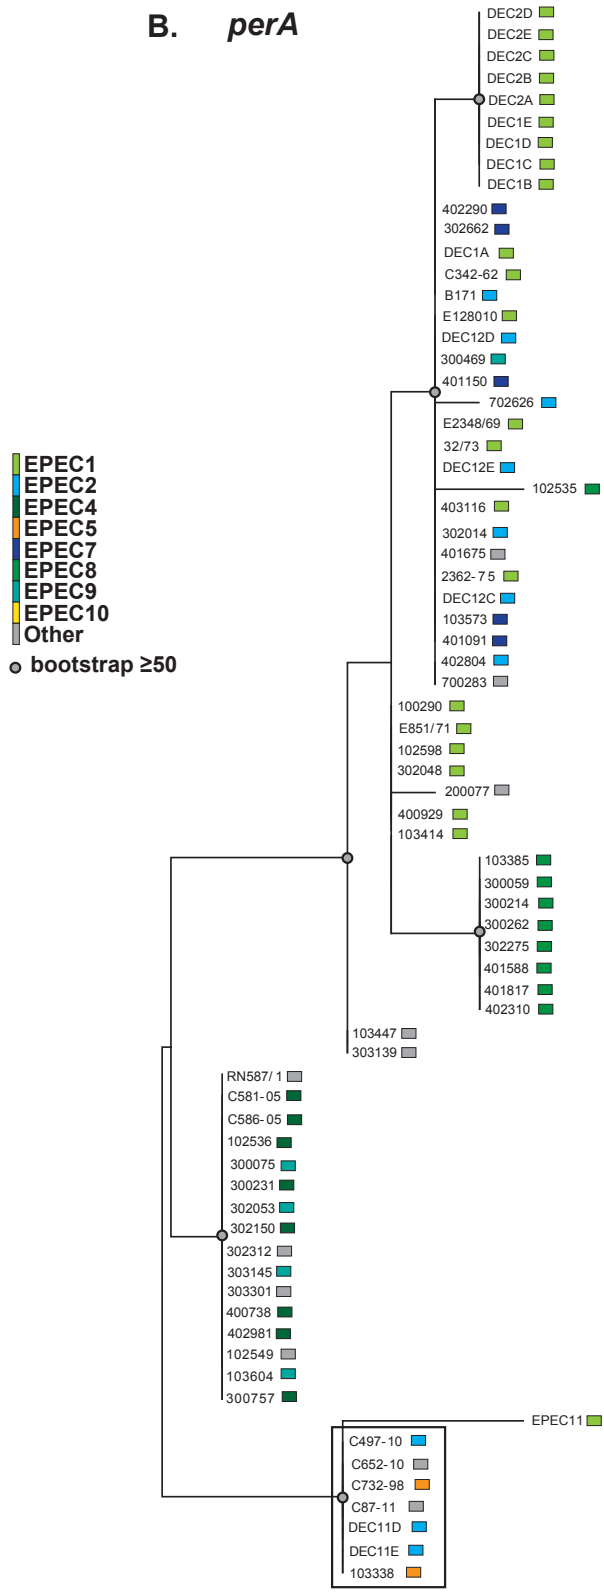

**Figure S4**

**Figure S4. Phylogenetic analysis of the nucleotide sequences of A) *bfpA*, and B) *perA* that were identified in each of the AEEC isolates included in this study.** A maximum likelihood phylogeny was constructed using the Kimura 2-parameter model and 1,000 bootstrap replicates. Bootstrap values  $\geq 50$  are designated by a circle. The scale bars represent the distance of the number of nucleotide substitutions per site. The genomes that have a truncated BFP operon are indicated by a “T”, and also by a box. The colored rectangle next to each EPEC isolate indicates the phylogenomic lineage the genome belongs to in Figure 1. Phylogenetic analysis of *bfpA* and *perA* demonstrated that for most of the AEEC isolates analyzed, these sequences had less sequence divergence and lineage-specificity than previously observed for other virulence factors such as the T3SS effectors (10).

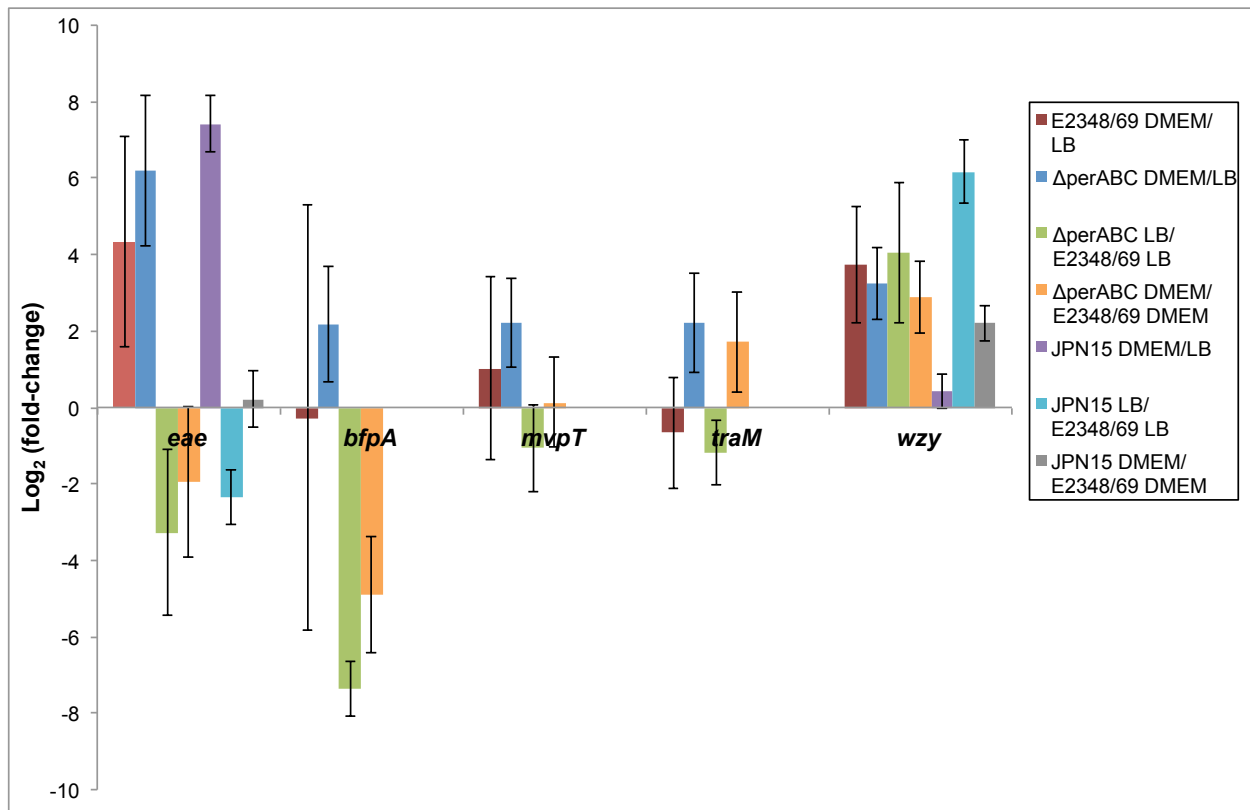

**Figure S5. qRT-PCR analysis of select genes that were determined to be differentially-expressed using RNA-Seq analysis.** Quantitative reverse transcription PCR (qRT-PCR) analysis of select genes for all RNA samples generated in this study. The values represent the  $\log_2$  of the relative fold-difference ( $2^{-\Delta\Delta C_t}$ ) of DMEM samples compared to LB samples for the wild-type E2348/69 and the two plasmid mutants, a  $\Delta$ perABC strain (11), and JPN15 (12, 13). The fold-change of each gene was calculated for two biological replicates and three technical replicates for each condition. The error bars denote the standard deviation of the  $\Delta\Delta C_t$  values. Each gene was calibrated using the reference gene *rpoA*. The expression trends observed using qRT-PCR were consistent with those determined using RNA-Seq.

**Table S1.** Genomes analyzed in this study

| Isolate ID | Serotype   | Location             | Inc-types<br>( <i>In silico</i> ) | Phylogenomic<br>Lineage | Phylogroup | <i>stx1</i> | <i>stx2</i> | <i>ehxA</i> | <i>bfpA</i> | <i>perA</i> | Accession Number |
|------------|------------|----------------------|-----------------------------------|-------------------------|------------|-------------|-------------|-------------|-------------|-------------|------------------|
| EDL933     | O157:H7    | Wisconsin, USA       | FIB, FIIA                         | EHEC1                   | E          | +           | +           | +           | -           | -           | NC_002655.2      |
| Sakai      | O157:H7    | Japan                | FIB, FIIA                         | EHEC1                   | E          | +           | +           | +           | -           | -           | NC_002695.1      |
| EC4115     | O157:H7    | Maine, USA           | FIB, FIIA, FIA                    | EHEC1                   | E          | -           | +           | +           | -           | -           | NC_011353.1      |
| TW14359    | O157:H7    | Michigan, USA        | FIB, FIIA, FIA                    | EHEC1                   | E          | -           | +           | +           | -           | -           | NC_013008.1      |
| DEC3A      | O157:H7    | Washington, USA      | FIB                               | EHEC1                   | E          | +           | +           | +           | -           | -           | AIFE00000000     |
| DEC3B      | O157:H7    | Washington, USA      | FIB, FIIA                         | EHEC1                   | E          | +           | +           | +           | -           | -           | AIFF00000000     |
| DEC3C      | O157:H7    | New Mexico, USA      | FIB, FIIA                         | EHEC1                   | E          | +           | +           | +           | -           | -           | AIFG00000000     |
| DEC3D      | O157:H7    | Michigan, USA        | FIB, FIIA                         | EHEC1                   | E          | +           | +           | +           | -           | -           | AIFH00000000     |
| DEC3E      | O157:H7    | Canada               | FIB, FIIA                         | EHEC1                   | E          | -           | +           | +           | -           | -           | AIFI00000000     |
| DEC3F      | O157:H7    | Germany              | FIB, FIIA, FIA                    | EHEC1                   | E          | -           | +           | +           | -           | -           | AIFJ00000000     |
| DEC4A      | O157:H7    | Argentina            | FIB, FIIA                         | EHEC1                   | E          | -           | -           | +           | -           | -           | AIFK00000000     |
| DEC4B      | O157:H7    | Denmark              | FIB, FIIA, FIA                    | EHEC1                   | E          | -           | +           | +           | -           | -           | AIFL00000000     |
| DEC4C      | O157:H7    | Egypt                | FIB, FIIA, FIA                    | EHEC1                   | E          | -           | -           | +           | -           | -           | AIFM00000000     |
| DEC4D      | O157:H7    | Japan                | FIB, FIIA, FIA                    | EHEC1                   | E          | -           | +           | +           | -           | -           | AIFN00000000     |
| DEC4E      | O157:H7    | Denmark              | FIB, FIIA                         | EHEC1                   | E          | +           | -           | +           | -           | -           | AIFO00000000     |
| DEC4F      | O157:H7    | Michigan, USA        | FIB, FIIA                         | EHEC1                   | E          | +           | +           | +           | -           | -           | AIFP00000000     |
| 86-24      | O157:H7    | Seattle, USA         | FIB, FIIA                         | EHEC1                   | E          | -           | +           | -           | -           | -           | AIAK00000000     |
| C842-97    | O157:H7    | Japan                | FIIA                              | EHEC1                   | E          | -           | -           | +           | -           | -           | AIBY00000000     |
| C354-03B   | O157:H-    | Great Britain        | FIB, FIIA, FIA                    | EHEC1                   | E          | -           | -           | +           | -           | -           | AIAW00000000     |
| CB9615     | O55:H7     | Germany              | FIB                               | EHEC1                   | E          | -           | -           | -           | -           | -           | NC_013941.1      |
| DEC5A      | O55:H7     | New York, USA        | FIB                               | EHEC1                   | E          | -           | -           | -           | -           | -           | AIFQ00000000     |
| DEC5B      | O55:H7     | Florida, USA         | FIIA                              | EHEC1                   | E          | -           | -           | -           | -           | -           | AIFR00000000     |
| DEC5C      | O55:H7     | New Jersey, USA      | FIB                               | EHEC1                   | E          | -           | -           | -           | -           | -           | AIFS00000000     |
| DEC5D      | O55:H7     | Sri Lanka            | FIB                               | EHEC1                   | E          | -           | -           | -           | -           | -           | AIFT00000000     |
| DEC5E      | O55:H7     | Iran                 | FIB, FIIA                         | EHEC1                   | E          | -           | -           | -           | -           | -           | AIFU00000000     |
| C12-92     | O55:H7     | Great Britain        | FIB                               | EHEC1                   | E          | -           | -           | -           | -           | -           | AIAE00000000     |
| C1244-91   | O55:H-     | Great Britain        | FIB                               | EHEC1                   | E          | -           | -           | -           | -           | -           | AIAD00000000     |
| C154-11    | O55:H7     | Denmark              | FIB                               | EHEC1                   | E          | -           | -           | -           | -           | -           | AIAF00000000     |
| C157-11    | O55:H-     | Denmark              | FIB, FIIA                         | EHEC1                   | E          | -           | -           | -           | -           | -           | AIAH00000000     |
| 11128      | O111:H-    | ND                   | FIIA, HI1, FIA                    | EHEC2                   | B1         | +           | +           | +           | -           | -           | NC_013364.1      |
| 11368      | O26:H11    | ND                   | FIB, FIIA, K/B/O                  | EHEC2                   | B1         | +           | -           | +           | -           | -           | NC_013361.1      |
| OK1114     | ND         | Oklahoma, USA        | FIIA                              | EHEC2                   | B1         | +           | +           | +           | -           | -           | AICG00000000     |
| OK1180     | ND         | Oklahoma, USA        | FIIA                              | EHEC2                   | B1         | +           | +           | +           | -           | -           | ADUQ00000000     |
| EHEC14     | ND         | Brazil               | FIB, K/B/O                        | EHEC2                   | B1         | +           | -           | +           | -           | -           | ADUN00000000     |
| DEC8A      | O111a:NM   | Maryland, USA        | FIB, FIIA, HI2                    | EHEC2                   | B1         | +           | -           | +           | -           | -           | AIGF00000000     |
| DEC8B      | O111:H8    | Idaho, USA           | FIIA                              | EHEC2                   | B1         | +           | +           | +           | -           | -           | AIGG00000000     |
| DEC8C      | O111:NM    | South Dakota, USA    | FIB, FIIA, K/B/O                  | EHEC2                   | B1         | +           | -           | +           | -           | -           | AIGH00000000     |
| DEC8D      | O111:H11   | Cuba                 | FIB, FIIA, K/B/O                  | EHEC2                   | B1         | -           | -           | +           | -           | -           | AIGI00000000     |
| DEC8E      | O111:H8    | Denmark              | none                              | EHEC2                   | B1         | +           | -           | -           | -           | -           | AIGJ00000000     |
| DEC9A      | O26:H11    | Wisconsin, USA       | none                              | EHEC2                   | B1         | -           | -           | -           | -           | -           | AIGK00000000     |
| DEC9B      | O26:HN     | New Hampshire, USA   | none                              | EHEC2                   | B1         | -           | -           | -           | -           | -           | AIGL00000000     |
| DEC9C      | O26:HN     | Switzerland          | none                              | EHEC2                   | B1         | -           | -           | -           | -           | -           | AIGM00000000     |
| DEC9D      | O26:H11    | Denmark              | FIIA                              | EHEC2                   | B1         | -           | -           | -           | -           | -           | AIGN00000000     |
| DEC9E      | O26:H11    | Mexico               | none                              | EHEC2                   | B1         | -           | -           | -           | -           | -           | AIGO00000000     |
| DEC10A     | O26:H11    | United Kingdom       | none                              | EHEC2                   | B1         | +           | -           | -           | -           | -           | AIGP00000000     |
| DEC10B     | O26:H11    | Australia            | FIB, K/B/O                        | EHEC2                   | B1         | +           | -           | -           | -           | -           | AIGQ00000000     |
| DEC10C     | O26:H11    | Delaware, USA        | none                              | EHEC2                   | B1         | +           | -           | -           | -           | -           | AIGR00000000     |
| DEC10D     | O26:H11    | France               | FIB, FIIA, K/B/O                  | EHEC2                   | B1         | -           | -           | +           | -           | -           | AIGS00000000     |
| DEC10F     | O15        | South Carolina, USA  | FIB, FIIA, I1, FIA                | EHEC2                   | B1         | -           | -           | -           | -           | -           | AIGU00000000     |
| C1214-90   | O26:H11    | India                | FIB, FIIA, K/B/O                  | EHEC2                   | B1         | -           | -           | +           | -           | -           | AIAC00000000     |
| C792-92    | O26:K:-H11 | Italy                | FIB, FIIA                         | EHEC2                   | B1         | -           | -           | -           | -           | -           | AIBR00000000     |
| C799-92    | O26:K:-H-  | Italy                | FIB, FIIA, I1                     | EHEC2                   | B1         | -           | -           | -           | -           | -           | AIBT00000000     |
| C347-93    | O26:K:-H-  | Thailand             | FIIA                              | EHEC2                   | B1         | -           | -           | -           | -           | -           | AIAU00000000     |
| C654-09    | O26:H-     | France               | FIB, I1, Y                        | EHEC2                   | B1         | -           | -           | -           | -           | -           | AIBJ00000000     |
| C717-10    | O103:H-    | Denmark              | FIB, FIIA, I1, Y                  | EHEC2                   | B1         | -           | -           | -           | -           | -           | AIBK00000000     |
| C824-10    | O128abc:H8 | Denmark              | FIB, FIIA                         | EHEC2                   | B1         | -           | -           | -           | -           | -           | AIBX00000000     |
| C155-11    | O26:H11    | Denmark              | FIB, FIIA, K/B/O                  | EHEC2                   | B1         | -           | -           | +           | -           | -           | AIAG00000000     |
| C166-11    | O26:H-     | Denmark              | I1                                | EHEC2                   | B1         | -           | -           | -           | -           | -           | AICF00000000     |
| E2348/69   | O127:H6    | Taunton, England     | FIB, FIIA                         | EPEC1                   | B2         | -           | -           | -           | +           | +           | NC_011601.1      |
| 2362-75    | O55:H6     | New Mexico, USA      | FIB, FIIA                         | EPEC1                   | B2         | -           | -           | -           | +           | +           | ADUL01000000     |
| E851/71    | O142:H6    | Scotland             | FIB, FIIA, Y                      | EPEC1                   | B2         | -           | -           | -           | +           | +           | ALNX00000000     |
| EPEC11     | NK         | Brazil               | FIB, FIIA, FIA                    | EPEC1                   | B2         | -           | -           | -           | +           | T           | AKYH00000000     |
| DEC1A      | O55:H6     | Pennsylvania, USA    | FIB, FIIA                         | EPEC1                   | B2         | -           | -           | -           | +           | +           | AIEV00000000     |
| DEC1B      | O55:H6     | Dutch Guiana         | FIB, FIIA                         | EPEC1                   | B2         | -           | -           | -           | +           | +           | AIEW00000000     |
| DEC1C      | O55:H6     | Germany              | FIB, FIIA                         | EPEC1                   | B2         | -           | -           | -           | +           | +           | AIEY00000000     |
| DEC1D      | O55:H6     | Egypt                | FIB                               | EPEC1                   | B2         | -           | -           | -           | +           | +           | AIEZ00000000     |
| DEC1E      | O55:H6     | Mexico               | FIB, FIIA                         | EPEC1                   | B2         | -           | -           | -           | +           | T           | AIEZ00000000     |
| DEC2A      | O55:H6     | Congo                | FIB, FIIA                         | EPEC1                   | B2         | -           | -           | -           | +           | +           | AIFA00000000     |
| DEC2B      | O55:NM     | Pennsylvania, USA    | FIB, FIIA                         | EPEC1                   | B2         | -           | -           | -           | +           | +           | AFJB00000000     |
| DEC2C      | O55:H6     | Pennsylvania, USA    | FIB, FIIA, Y, K/B/O               | EPEC1                   | B2         | -           | -           | -           | +           | +           | AIFB00000000     |
| DEC2D      | O55:H6     | France               | FIB, FIIA                         | EPEC1                   | B2         | -           | -           | -           | +           | +           | AIFC00000000     |
| DEC2E      | O55:H6     | Texas, USA           | FIB                               | EPEC1                   | B2         | -           | -           | -           | +           | +           | AIFD00000000     |
| 100290     | ND         | The Gambia           | FIB, FIIA                         | EPEC1                   | B2         | -           | -           | -           | +           | +           | JHQV00000000     |
| 302048     | ND         | Mozambique           | FIB, FIIA                         | EPEC1                   | B2         | -           | -           | -           | +           | +           | JHRF00000000     |
| 303289     | ND         | Mozambique           | FIB, FIIA                         | EPEC1                   | B2         | -           | -           | -           | +           | +           | JHRJ00000000     |
| 401031     | ND         | Kenya                | FIB, FIIA                         | EPEC1                   | B2         | -           | -           | -           | +           | -           | JHRL00000000     |
| 102598     | ND         | The Gambia           | FIB, FIIA                         | EPEC1                   | B2         | -           | -           | -           | +           | +           | JHRW00000000     |
| 401195     | ND         | Kenya                | FIB, FIIA, P                      | EPEC1                   | B2         | -           | -           | -           | +           | -           | JHTF00000000     |
| 403116     | ND         | Kenya                | FIB, FIIA, P                      | EPEC1                   | B2         | -           | -           | -           | +           | +           | JHTJ00000000     |
| 400929     | ND         | Kenya                | FIB, FIIA, P                      | EPEC1                   | B2         | -           | -           | -           | +           | +           | JHTE00000000     |
| B171       | O111:NM    | Washington D.C., USA | FIB, FIIA, P                      | EPEC2                   | B1         | -           | -           | -           | +           | +           | AAJX00000000     |

|          |            |                |                       |        |    |   |   |   |   |   |               |
|----------|------------|----------------|-----------------------|--------|----|---|---|---|---|---|---------------|
| 32/73    | O126:H2    | England        | FIB, FIIA             | EPEC2  | B1 | - | - | - | + | + | LAF000000000  |
| C342-62  | O126:H2    | Egypt          | FIB, FIIA             | EPEC2  | B1 | - | - | - | + | + | AKNI000000000 |
| E128010  | O114:H2    | Bangladesh     | FIB, FIIA, FIA        | EPEC2  | B1 | - | - | - | + | + | ADU0000000000 |
| DEC11A   | O128a:H2   | Montana, USA   | FIB, FIIA, FIC        | EPEC2  | B1 | - | - | - | - | - | AIGV000000000 |
| DEC11B   | O128a:H3   | Missouri, USA  | none                  | EPEC2  | B1 | - | - | - | - | - | AIGW000000000 |
| DEC11C   | O45:H2     | Michigan, USA  | FIB                   | EPEC2  | B1 | + | - | + | - | - | AIGX000000000 |
| DEC11D   | O128:H2    | United Kingdom | FIB, FIIA, FIA        | EPEC2  | B1 | - | - | - | T | + | AIGY000000000 |
| DEC11E   | O128:H2    | Brazil         | FIIA                  | EPEC2  | B1 | - | - | - | - | + | AIGZ000000000 |
| DEC12A   | O111:H2    | United Kingdom | FIB                   | EPEC2  | B1 | - | - | - | - | - | AIHA000000000 |
| DEC12B   | O111:H2    | Florida, USA   | FIB, FIIA, Y          | EPEC2  | B1 | - | - | - | + | - | AIHB000000000 |
| DEC12C   | O111:NM    | Panama         | FIB, FIIA             | EPEC2  | B1 | - | - | - | + | T | AIHC000000000 |
| DEC12D   | O111:H2    | Peru           | FIB, FIIA             | EPEC2  | B1 | - | - | - | + | + | AIHD000000000 |
| DEC12E   | O111:HN    | Kenya          | FIB, FIIA, I1         | EPEC2  | B1 | - | - | - | + | + | AIHE000000000 |
| E22      | O103:H2    | ND             | FIB, FIIA, FIC        | EPEC2  | B1 | - | - | - | - | - | AAJV000000000 |
| H.I.8    | O128:H-    | ND             | FIB, FIIA             | EPEC2  | B1 | + | - | - | + | + | AFDY000000000 |
| 12009    | O103:H2    | ND             | FIB                   | EPEC2  | B1 | + | + | + | - | - | NC_013353.1   |
| C900-01  | O103:H2    | Guinea-Bissau  | FIB                   | EPEC2  | B1 | - | - | + | - | - | AICC000000000 |
| C488-07  | O128abc:H- | Denmark        | FIB, FIIA, FIA        | EPEC2  | B1 | - | - | - | - | - | AIBA000000000 |
| C341-10  | O128ab:H-  | Denmark        | FIB, FIIA             | EPEC2  | B1 | - | - | - | - | - | AIAS000000000 |
| C497-10  | O119:H2    | Denmark        | FIB, FIIA, FIA        | EPEC2  | B1 | - | - | - | T | + | AIBC000000000 |
| C82-11   | O128abc:H2 | Denmark        | FIB, FIIA, FIC, FIA   | EPEC2  | B1 | - | - | - | - | - | AIBW000000000 |
| C170-11  | O128ab:H2  | Denmark        | FIB, FIIA, FIC, FIA   | EPEC2  | B1 | - | - | - | - | - | AIAJ000000000 |
| 302014   | ND         | Mozambique     | FIB, FIIA, P          | EPEC2  | B1 | - | - | - | + | + | JHRE000000000 |
| 401954   | ND         | Kenya          | FIB, FIIA, FIA        | EPEC2  | B1 | - | - | - | + | - | JHRP000000000 |
| 703533   | ND         | Pakistan       | FIB, FIIA             | EPEC2  | B1 | - | - | - | + | - | JHRS000000000 |
| 103578   | ND         | The Gambia     | FIB, FIIA             | EPEC2  | B1 | - | - | - | + | - | JHRY000000000 |
| 402804   | ND         | Kenya          | FIB, FIIA, FIA        | EPEC2  | B1 | - | - | - | + | + | JHSN000000000 |
| 702423   | ND         | Pakistan       | FIB, FIIA             | EPEC2  | B1 | - | - | - | + | - | JHSO000000000 |
| 702626   | ND         | Pakistan       | FIB, FIIA, FIA, K/B/O | EPEC2  | B1 | - | - | - | + | + | JHSP000000000 |
| 703450   | ND         | Pakistan       | FIB, FIIA             | EPEC2  | B1 | - | - | - | + | - | JHTM000000000 |
| C2139-99 | O111:H7    | Denmark        | FIIA, I1              | EPEC4  | B2 | - | - | - | - | - | AIAM000000000 |
| C581-05  | O119:H6    | Africa         | FIB, FIIA             | EPEC4  | B2 | - | - | - | + | + | AIBE000000000 |
| C586-05  | O119:H-    | Africa         | FIB, FIIA             | EPEC4  | B2 | - | - | - | + | + | AIBG000000000 |
| C79-08   | O33:H6     | Slovenia       | none                  | EPEC4  | B2 | - | - | - | - | - | AIBQ000000000 |
| C887-10  | O113:H6    | Denmark        | FIIA, I1              | EPEC4  | B2 | - | - | - | - | - | AICB000000000 |
| 100414   | ND         | The Gambia     | FIB, FIIA             | EPEC4  | B2 | - | - | - | + | - | JHQX000000000 |
| 203741   | ND         | Mali           | FIB, FIIA, Y, P       | EPEC4  | B2 | - | - | - | + | - | JHRB000000000 |
| 102536   | ND         | The Gambia     | FIB, FIIA, Y, P       | EPEC4  | B2 | - | - | - | + | + | JHRV000000000 |
| 302150   | ND         | Mozambique     | FIB, FIIA             | EPEC4  | B2 | - | - | - | + | + | JHSD000000000 |
| 300231   | ND         | Mozambique     | FIB, FIIA             | EPEC4  | B2 | - | - | - | + | + | JHSC000000000 |
| 400738   | ND         | Kenya          | FIB, FIIA, P          | EPEC4  | B2 | - | - | - | + | + | JHSH000000000 |
| 302137   | ND         | Mozambique     | none                  | EPEC4  | B2 | - | - | - | - | - | JHSZ000000000 |
| 402981   | ND         | Kenya          | FIB, FIIA, P          | EPEC4  | B2 | - | - | - | + | + | JHTI000000000 |
| 401140   | ND         | Kenya          | FIB, FIIA, P          | EPEC5  | B1 | - | - | - | + | - | JHRM000000000 |
| 401210   | ND         | Kenya          | FIB, FIIA, P          | EPEC5  | B1 | - | - | - | - | - | JHSJ000000000 |
| 103338   | ND         | The Gambia     | FIB, FIIA, FIA        | EPEC5  | B1 | - | - | - | T | + | JHSU000000000 |
| C732-98  | O88:H-     | Israel         | FIB, FIIA, FIA        | EPEC5  | A  | - | - | - | T | + | AIBM000000000 |
| C751-03  | O49:H-     | Austria        | FIIA                  | EPEC5  | A  | - | - | + | - | - | AIBO000000000 |
| 100343   | ND         | The Gambia     | FIB, FIIA             | EPEC7  | B1 | - | - | - | + | - | JHQW000000000 |
| 103573   | ND         | The Gambia     | FIB, FIIA             | EPEC7  | B1 | - | - | - | + | + | JHRA000000000 |
| 302662   | ND         | Mozambique     | FIB, FIIA, P          | EPEC7  | B1 | - | - | - | + | + | JHRI000000000 |
| 400791   | ND         | Kenya          | FIB, FIIA, P          | EPEC7  | B1 | - | - | - | + | - | JHRK000000000 |
| 402290   | ND         | Kenya          | FIB, FIIA, P          | EPEC7  | B1 | - | - | - | + | + | JHRQ000000000 |
| 401150   | ND         | Kenya          | FIB, FIIA, P          | EPEC7  | B1 | - | - | - | + | T | JHRN000000000 |
| 200146   | ND         | Mali           | FIB, FIIA             | EPEC7  | B1 | - | - | - | + | + | JHRZ000000000 |
| 302687   | ND         | Mozambique     | FIB, FIIA             | EPEC7  | B1 | - | - | - | + | - | JHSE000000000 |
| 401091   | ND         | Kenya          | FIB, FIIA, P          | EPEC7  | B1 | - | - | - | + | + | JHSI000000000 |
| 303341   | ND         | Mozambique     | none                  | EPEC7  | B1 | - | - | - | - | - | JHTD000000000 |
| 403341   | ND         | Kenya          | FIIA                  | EPEC7  | B1 | - | - | - | - | - | JHTK000000000 |
| C527-94  | O153:H12   | Denmark        | FIB, FIIA, FIC        | EPEC7  | B1 | - | - | - | - | - | AIBD000000000 |
| 103385   | ND         | The Gambia     | FIB, FIIA             | EPEC8  | B2 | - | - | - | + | + | JHQZ000000000 |
| 300059   | ND         | Mozambique     | FIB, FIIA, P          | EPEC8  | B2 | - | - | - | + | + | JHRC000000000 |
| 300262   | ND         | Mozambique     | FIB, FIIA, P          | EPEC8  | B2 | - | - | - | + | + | JHRD000000000 |
| 302275   | ND         | Mozambique     | FIB, FIIA, P          | EPEC8  | B2 | - | - | - | + | + | JHRH000000000 |
| 401264   | ND         | Kenya          | FIB, FIIA, P          | EPEC8  | B2 | - | - | - | + | - | JHRO000000000 |
| 300214   | ND         | Mozambique     | FIB, FIIA, P          | EPEC8  | B2 | - | - | - | + | + | JHSB000000000 |
| 402310   | ND         | Kenya          | FIB, FIIA             | EPEC8  | B2 | - | - | - | + | + | JHSM000000000 |
| 401817   | ND         | Kenya          | FIB, FIIA             | EPEC8  | B2 | - | - | - | + | + | JHSL000000000 |
| 401588   | ND         | Kenya          | FIB, FIIA, P          | EPEC8  | B2 | - | - | - | + | + | JHSK000000000 |
| 102535   | ND         | The Gambia     | FIB, FIIA             | EPEC8  | B2 | - | - | - | + | + | JHST000000000 |
| 302053   | ND         | Mozambique     | FIB, FIIA             | EPEC9  | B2 | - | - | - | + | + | JHRG000000000 |
| 702324   | ND         | Pakistan       | FIB, FIIA, FIA, P     | EPEC9  | B2 | - | - | - | + | - | JHRR000000000 |
| 303145   | ND         | Mozambique     | FIB, FIIA             | EPEC9  | B2 | - | - | - | + | + | JHSG000000000 |
| 300075   | ND         | Mozambique     | FIB, FIIA             | EPEC9  | B2 | - | - | - | + | + | JHSA000000000 |
| 300847   | ND         | Mozambique     | FIB, FIIA             | EPEC9  | B2 | - | - | - | + | - | JHSY000000000 |
| 300469   | ND         | Mozambique     | FIB, FIIA, FIA        | EPEC9  | B2 | - | - | - | + | - | JHSX000000000 |
| C796-10  | O142:H34   | Denmark        | FIIA                  | EPEC9  | B2 | - | - | - | - | - | AIBS000000000 |
| 100329   | ND         | The Gambia     | FIB, FIIA             | EPEC10 | B1 | - | - | - | + | - | JHRT000000000 |
| 100854   | ND         | The Gambia     | FIIA, P               | EPEC10 | B1 | - | - | - | - | - | JHRU000000000 |
| C260-92  | O127:K:H40 | Italy          | FIB, FIIA, K/B/O      | EPEC10 | A  | - | - | - | - | - | AIAO000000000 |
| C213-10  | O127:H40   | Denmark        | FIB, FIIA, FIA        | EPEC10 | A  | - | - | - | - | - | AIAL000000000 |
| C496-10  | O145:H40   | Denmark        | FIIA                  | EPEC10 | A  | - | - | - | - | - | AIBB000000000 |
| 102549   | ND         | The Gambia     | FIIA, P               | NC     | B2 | - | - | - | + | + | JZXE000000000 |
| 103334   | ND         | The Gambia     | FIB, FIIA, FIC, P     | NC     | B1 | - | - | - | + | - | JZXF000000000 |

|         |           |               |                   |       |    |   |   |   |   |   |              |
|---------|-----------|---------------|-------------------|-------|----|---|---|---|---|---|--------------|
| 102687  | ND        | The Gambia    | FIB, FIIA         | EPEC7 | B1 | - | - | - | + | - | JZXG00000000 |
| 102556  | ND        | The Gambia    | FIB, FIIA, P, Y   | EPEC4 | B2 | - | - | - | + | - | JZXH00000000 |
| 103414  | ND        | The Gambia    | FIB, FIIA, Y      | EPEC1 | B2 | - | - | - | + | T | JZXI00000000 |
| 102667  | ND        | The Gambia    | FIB, FIIA, P, FIA | EPEC9 | B2 | - | - | - | + | - | JZXJ00000000 |
| 102713  | ND        | The Gambia    | FIB, FIIA, P      | EPEC8 | B2 | - | - | - | + | - | JZXK00000000 |
| 103604  | ND        | The Gambia    | FIB, FIIA, I1     | EPEC9 | B2 | - | - | - | + | + | JZXL00000000 |
| 300757  | ND        | Mozambique    | FIB, FIIA         | EPEC4 | B2 | - | - | - | + | + | JZXM00000000 |
| 102550  | ND        | The Gambia    | FIB, FIIA, P, FIC | NC    | B1 | - | - | - | + | - | JHQY00000000 |
| 102929  | ND        | The Gambia    | FIB, FIIA         | NC    | B1 | - | - | - | - | - | JHRX00000000 |
| 302909  | ND        | Mozambique    | FIB, FIIA         | NC    | B2 | - | - | - | + | - | JHSF00000000 |
| 100175  | ND        | The Gambia    | FIB               | NC    | B1 | - | - | - | - | - | JHSR00000000 |
| 102132  | ND        | The Gambia    | FIB, I1           | NC    | E  | - | - | - | + | - | JHSS00000000 |
| 103447  | ND        | The Gambia    | FIB, FIIA, P, FIC | NC    | B1 | - | - | - | + | + | JHSV00000000 |
| 100100  | ND        | The Gambia    | FIB               | NC    | E  | - | - | - | + | - | JHSQ00000000 |
| 200077  | ND        | Mali          | FIB, FIIA         | NC    | B2 | - | - | - | + | + | JHSW00000000 |
| 303301  | ND        | Mozambique    | FIB, FIIA, P      | NC    | B2 | - | - | - | + | + | JHTC00000000 |
| 303139  | ND        | Mozambique    | FIB, FIIA, FIC    | NC    | B1 | - | - | - | + | + | JHTB00000000 |
| 302312  | ND        | Mozambique    | FIB, FIIA, P      | NC    | B2 | - | - | - | + | + | JHTA00000000 |
| 402559  | ND        | Kenya         | FIB, FIIA         | NC    | B2 | - | - | - | + | - | JHTH00000000 |
| 401675  | ND        | Kenya         | FIB, FIIA         | NC    | B2 | - | - | - | + | + | JHTG00000000 |
| 700283  | ND        | Pakistan      | FIB, FIIA, P, FIA | NC    | B2 | - | - | - | + | + | JHTL00000000 |
| RN587/1 | O157:H8   | Brazil        | FIB, FIIA, FIA    | NC    | B2 | - | - | - | + | + | ADUS00000000 |
| C9-92   | O127:H45  | Great Britain | I1                | NC    | B2 | - | - | - | - | - | AICE00000000 |
| C844-97 | O157:H45  | Japan         | none              | NC    | B2 | - | - | - | - | - | AIBZ00000000 |
| C639-08 | O157:H45  | Denmark       | FIB, FIIA         | NC    | B2 | - | - | - | - | - | AIBH00000000 |
| E110019 | O111:H9   | Finland       | FIB, FIIA         | NC    | B1 | - | - | - | - | - | AAJW00000000 |
| C725-88 | O86:H6    | Germany       | FIB, FIIA         | NC    | B1 | - | - | - | + | - | AIBL00000000 |
| C418-89 | O125ac:H6 | Italy         | none              | NC    | B2 | - | - | - | - | - | AIAY00000000 |
| C238-91 | O103:H25  | Germany       | FIB               | NC    | B1 | - | - | - | + | - | AIAN00000000 |
| C743-03 | O111:H19  | Austria       | FIB               | NC    | B1 | - | - | - | - | - | AIBN00000000 |
| C80-08  | O98:H8    | Slovenia      | FIB, FIIA         | NC    | B1 | - | - | - | + | - | AIBU00000000 |
| C343-08 | O111:H38  | Denmark       | FIB               | NC    | B1 | - | - | - | - | - | AIAT00000000 |
| C78-09C | O132:H34  | Belgium       | none              | NC    | B2 | - | - | - | - | - | AIBP00000000 |
| C283-09 | O177:H-   | Slovenia      | FIB, FIIA         | NC    | B1 | - | - | - | + | - | AIAQ00000000 |
| C353-09 | O167:H9   | Denmark       | none              | NC    | D  | - | - | - | - | - | AIAV00000000 |
| C807-09 | O3:H8     | Denmark       | none              | NC    | B1 | - | - | - | - | - | AIBV00000000 |
| C262-10 | O114:H49  | Denmark       | none              | NC    | B2 | - | - | - | - | - | AIAP00000000 |
| C295-10 | O55:H34   | Denmark       | I1                | NC    | B2 | - | - | - | - | - | AIAR00000000 |
| C458-10 | O153:H21  | Denmark       | none              | NC    | B1 | - | - | - | - | - | AIAZ00000000 |
| C652-10 | O88:H25   | Denmark       | FIB, FIIA, FIA    | NC    | B1 | - | - | - | - | T | AIBI00000000 |
| C40-11  | O145:H25  | Denmark       | FIB, FIIA, K/B/O  | NC    | B1 | - | - | - | + | - | AIAX00000000 |
| C58-11  | O145:H34  | Denmark       | Y                 | NC    | B2 | - | - | - | - | - | AIBF00000000 |
| C87-11  | O111:H8   | Denmark       | FIB, FIIA, FIA, Y | NC    | B1 | - | - | - | - | T | AICA00000000 |
| C93-11  | O157:H-   | Denmark       | FIB               | NC    | B2 | - | - | - | - | - | AICD00000000 |
| C161-11 | O145:H-   | Denmark       | FIB, FIIA, K/B/O  | NC    | E  | - | - | - | + | - | AIAI00000000 |

*E. coli* and *Shigella* reference genomes included in the phylogenomic analysis

| Isolate ID                  | Pathovar        | Phylogroup | Accession Number |
|-----------------------------|-----------------|------------|------------------|
| 53638                       | EIEC            | A          | AAKB00000000.2   |
| HS                          | commensal       | A          | NC_009800.1      |
| ATCC 8739                   | lab adapted     | A          | NC_010468.1      |
| BL21                        | lab adapted     | A          | NC_012947.1      |
| BW2952                      | lab adapted     | A          | NC_012759.1      |
| H10407                      | ETEC            | A          | NC_017633.1      |
| <i>S. flexneri</i> 2A 2457T | <i>Shigella</i> | B1         | NC_004741.1      |
| <i>S. sonnei</i> 046        | <i>Shigella</i> | B1         | NC_007384.1      |
| <i>S. boydii</i> 3083-94    | <i>Shigella</i> | B1         | NC_010658.1      |
| B7A                         | ETEC            | B1         | AAJT00000000.2   |
| E24377A                     | ETEC            | B1         | NC_009801.1      |
| IAI1                        | fecal isolate   | B1         | NC_011741.1      |
| SE11                        | fecal isolate   | B1         | NC_011415.1      |
| CFT073                      | ExPEC           | B2         | NC_004431.1      |
| S88                         | ExPEC           | B2         | NC_011742.1      |
| UTI89                       | ExPEC           | B2         | NC_007946.1      |
| 536                         | ExPEC           | B2         | NC_008253.1      |
| TY-2482                     | EAEC            | B1         | AFOG00000000.1   |
| 55989                       | EAEC            | B1         | NC_011748.1      |
| 042                         | EAEC            | D          | FN554766.1       |
| 101-1                       | EAEC            | A          | AAMK00000000.2   |
| UMN026                      | ExPEC           | D          | NC_011751.1      |
| <i>S. dysenteriae</i> Sd197 | <i>Shigella</i> | E          | NC_007606.1      |
| IAI39                       | ExPEC           | F          | NC_011750.1      |
| SMS-3-5                     | other           | F          | NC_010498.1      |



**Table S2.** Primers used in this study

| Gene        | Predicted Protein Function                | Protein Accession No. <sup>a</sup> | Primer ID           | Sequence 5'-3'                   | Source     |
|-------------|-------------------------------------------|------------------------------------|---------------------|----------------------------------|------------|
| <i>rpoA</i> | RNA polymerase, alpha subunit             | NA                                 | Ec-rpoA-F           | TGTAGGCAATACGCTCCACA             | (14)       |
|             |                                           |                                    | Ec-rpoA-R           | GGTTATGTGCCGGCTTCTAC             | "          |
| <i>eae</i>  | Intimin, attachment protein               | YP_002331401.1                     | eae_361F            | TATAGTGCCTTACCTGTCTTAGGTTCCG     | (15)       |
|             |                                           |                                    | eae_495R            | ATAATTTAGAGCCTTGTTCATCGGTCGTG    | "          |
| <i>bfpA</i> | major subunit of the bundle-forming pilus | YP_002332157.1                     | bfpA_118F           | GCGTCTGATTCCAATAAGTCGCAGAATG     | "          |
|             |                                           |                                    | bfpA_380R           | GCTTTATCCAACCTGGTAAGCGTCAGAT     | "          |
| <i>perA</i> | transcriptional activator                 | YP_002332173.1                     | perA_332F           | CTGCGAACCTCAATGAAATGCAATTG       | "          |
|             |                                           |                                    | perA_506R           | CTGTCTACGATGCTCTTAGATGAAGCAC     | "          |
| <i>rbsD</i> | D-ribose pyranase                         | YP_002331517.1                     | rbsD_57F            | ACATACCGATACGCTGGTGGTGTGT        | "          |
|             |                                           |                                    | rbsD_253R           | GCAACGTTTTCGTGGAGTTGCGGATTA      | "          |
| <i>nirC</i> | nitrite transporter                       | YP_002331085.1                     | nirC_190F           | ACCTTTGGTATCGCCTTAACGCTGG        | "          |
|             |                                           |                                    | nirC_357R           | AACGAAGACGGAACCGACCAGGTTAC       | "          |
| <i>mvpT</i> | post-segregational killing toxin          | YP_002332186.1                     | mvpT_107F           | CAGGAACTGCTTCAATGCTTCTTGAATTAGG  | This study |
|             |                                           |                                    | mvpT_286R           | CGGATACATGAGGACTGAGAGACTCAATACC  | "          |
| <i>traM</i> | conjugal transfer protein                 | YP_002332219.1                     | traM_101F           | GCCTTTCAGGAACTGCTTCAATGCTTCTTG   | "          |
|             |                                           |                                    | traM_287R           | CCGGATACATGAGGACTGAGAGACTCAATACC | "          |
| <i>wzy</i>  | O-antigen polymerase                      | YP_002329685.1                     | wzy_E2348_85<br>9F  | CCAGCGTCACCAATTAGCTTGGAG         | "          |
|             |                                           |                                    | wzy_E2348_10<br>39R | CATCGCAAATATGCAGGCCATAATGAC      | "          |

<sup>a</sup>Primers were selected by comparing with the sequences from all EPEC genomes analyzed; however, the protein accession number is provided for the respective gene from the E2348/69 genome.

## **Data Sets**

**Data Set 1.** Differentially-expressed genes identified by RNA-Seq analysis of E2348/69 grown in DMEM compared to LB

**Data Set 2.** Differentially-expressed genes identified by RNA-Seq analysis of E2348/69 compared to *perABC* grown in LB

**Data Set 3.** Differentially-expressed genes identified by RNA-Seq analysis of E2348/69 compared to *perABC* grown in DMEM

**Data Set 4.** Differentially-expressed genes identified by RNA-Seq analysis of *perABC* grown in DMEM compared to LB

**Data Set 5.** Differentially-expressed genes identified by RNA-Seq analysis of JPN15 compared to *perABC* grown in LB

**Data Set 6.** Differentially-expressed genes identified by RNA-Seq analysis of JPN15 compared to *perABC* grown in DMEM

**Data Set 7.** Differentially-expressed genes identified by RNA-Seq analysis of E2348/69 compared to JPN15 grown in LB

**Data Set 8.** Differentially-expressed genes identified by RNA-Seq analysis of E2348/69 compared to JPN15 grown in DMEM

**Data Set 9.** Differentially-expressed genes identified by RNA-Seq analysis of JPN15 grown in DMEM compared to LB

## References

1. **Rasko DA, Myers GS, Ravel J.** 2005. Visualization of comparative genomic analyses by BLAST score ratio. *BMC Bioinf* **6**:2.
2. **Gertz EM, Yu YK, Agarwala R, Schaffer AA, Altschul SF.** 2006. Composition-based statistics and translated nucleotide searches: improving the TBLASTN module of BLAST. *BMC Biol* **4**:41.
3. **Eisen MB, Spellman PT, Brown PO, Botstein D.** 1998. Cluster analysis and display of genome-wide expression patterns. *Proc Natl Acad Sci USA* **95**:14863-14868.
4. **Saeed AI, Bhagabati NK, Braisted JC, Liang W, Sharov V, Howe EA, Li J, Thiagarajan M, White JA, Quackenbush J.** 2006. TM4 microarray software suite. *Methods Enzymol* **411**:134-193.
5. **Saeed AI, Sharov V, White J, Li J, Liang W, Bhagabati N, Braisted J, Klapa M, Currier T, Thiagarajan M, Sturn A, Snuffin M, Rezantsev A, Popov D, Ryltsov A, Kostukovich E, Borisovsky I, Liu Z, Vinsavich A, Trush V, Quackenbush J.** 2003. TM4: a free, open-source system for microarray data management and analysis. *Biotechniques* **34**:374-378.
6. **Lacher DW, Steinsland H, Blank TE, Sonnenberg MS, Whittam TS.** 2007. Molecular evolution of typical enteropathogenic *Escherichia coli*: clonal analysis by multilocus sequence typing and virulence gene allelic profiling. *J Bacteriol* **189**:342-350.
7. **Ogura Y, Ooka T, Iguchi A, Toh H, Asadulghani M, Oshima K, Kodama T, Abe H, Nakayama K, Kurokawa K, Tobe T, Hattori M, Hayashi T.** 2009. Comparative genomics reveal the mechanism of the parallel evolution of O157 and non-O157 enterohemorrhagic *Escherichia coli*. *Proc Natl Acad Sci USA* **106**:17939-17944.
8. **Brinkley C, Burland V, Keller R, Rose DJ, Boutin AT, Klink SA, Blattner FR, Kaper JB.** 2006. Nucleotide sequence analysis of the enteropathogenic *Escherichia coli* adherence factor plasmid pMAR7. *Infect. Immun.* **74**:5408-5413.
9. **Iguchi A, Thomson NR, Ogura Y, Saunders D, Ooka T, Henderson IR, Harris D, Asadulghani M, Kurokawa K, Dean P, Kenny B, Quail MA, Thurston S, Dougan G, Hayashi T, Parkhill J, Frankel G.** 2009. Complete genome sequence and comparative genome analysis of enteropathogenic *Escherichia coli* O127:H6 strain E2348/69. *J Bacteriol* **191**:347-354.
10. **Hazen TH, Sahl JW, Fraser CM, Sonnenberg MS, Scheutz F, Rasko DA.** 2013. Refining the pathovar paradigm via phylogenomics of the attaching and effacing *Escherichia coli*. *Proc Natl Acad Sci USA* **110**:12810-12815.
11. **Leverton LQ.** 2004. An examination of enteropathogenic *Escherichia coli* virulence gene regulation. University of Maryland, Baltimore.
12. **Jerse AE, Yu J, Tall BD, Kaper JB.** 1990. A genetic locus of enteropathogenic *Escherichia coli* necessary for the production of attaching and effacing lesions on tissue culture cells. *Proc Natl Acad Sci USA* **87**:7839-7843.
13. **Levine MM, Nataro JP, Karch H, Baldini MM, Kaper JB, Black RE, Clements ML, O'Brien AD.** 1985. The diarrheal response of humans to some classic

serotypes of enteropathogenic *Escherichia coli* is dependent on a plasmid encoding an enteroadhesiveness factor. J Infect Dis **152**:550-559.

14. **Sahl JW, Rasko DA.** 2012. Analysis of Global Transcriptional Profiles of Enterotoxigenic *Escherichia coli* Isolate E24377A. Infect. Immun. **80**:1232-1242.
15. **Hazen TH, Daugherty SC, Shetty A, Mahurkar AA, White O, Kaper JB, Rasko DA.** 2015. RNA-Seq analysis of isolate- and growth phase-specific differences in the global transcriptomes of enteropathogenic *Escherichia coli* prototype isolates. Front Microbiol **6**.
